# Supplementary material for: Design and self-assembly of variform organometallic macrocycle with terminal imidazole-based bridging ligands utilizing joints twist and rotation
Source: Royal Society of Chemistry journal article supplement (doi:10.1039/c3dt52724g), 2013-10-30
Supplement: c3dt52724g.pdf [file c3dt52724g.pdf]

Supplementary Material (ESI) for Chemical Communications  
This journal is (c) The Royal Society of Chemistry 2012

## Supporting Information for

### **Sunlight induced photocycloaddition and host-guest property of self-assembled organometallic macrocycles based on a versatile building block**

Tong Wu, Yue-Jian Lin and Guo-Xin Jin\*

*Shanghai Key Laboratory of Molecular Catalysis and Innovative Material, Department of Chemistry,*

*Fudan University, Shanghai, 200433, P. R. China.*

*E-mail:* [gxjin@fudan.edu.cn](mailto:gxjin@fudan.edu.cn)

S1.

Table 1. Crystal data and structure refinement of **2b**, **3a**, **3b** and **4b**

|                                                                                               | <b>2b</b>                                                                                                       | <b>3a</b>                                                                                                     | <b>3b</b>                                                                                                     | <b>4b</b>                                                                                                   |
|-----------------------------------------------------------------------------------------------|-----------------------------------------------------------------------------------------------------------------|---------------------------------------------------------------------------------------------------------------|---------------------------------------------------------------------------------------------------------------|-------------------------------------------------------------------------------------------------------------|
| Formula                                                                                       | C <sub>98</sub> H <sub>104</sub> F <sub>12</sub> N <sub>16</sub> O <sub>14</sub> Rh <sub>4</sub> S <sub>4</sub> | C <sub>84</sub> H <sub>116</sub> F <sub>6</sub> N <sub>8</sub> O <sub>14</sub> Ir <sub>2</sub> S <sub>2</sub> | C <sub>84</sub> H <sub>116</sub> F <sub>6</sub> N <sub>8</sub> O <sub>14</sub> Rh <sub>2</sub> S <sub>2</sub> | C <sub>68</sub> H <sub>70</sub> F <sub>6</sub> N <sub>8</sub> O <sub>7</sub> Rh <sub>2</sub> S <sub>2</sub> |
| F <sub>w</sub>                                                                                | 2497.85                                                                                                         | 2024.36                                                                                                       | 1845.78                                                                                                       | 1421.12                                                                                                     |
| Crystal system                                                                                | Triclinic                                                                                                       | Monoclinic                                                                                                    | Monoclinic                                                                                                    | Orthorhombic                                                                                                |
| space group                                                                                   | P-1                                                                                                             | C2/c                                                                                                          | C2/c                                                                                                          | Fdd2                                                                                                        |
| <i>a</i> (Å)                                                                                  | 9.1607(8)                                                                                                       | 36.2926(8)                                                                                                    | 36.307(3)                                                                                                     | 31.441(5)                                                                                                   |
| <i>b</i> (Å)                                                                                  | 13.0306(11)                                                                                                     | 16.2805(4)                                                                                                    | 16.2368(14)                                                                                                   | 17.427(3)                                                                                                   |
| <i>c</i> (Å)                                                                                  | 22.4758(18)                                                                                                     | 28.4835(6)                                                                                                    | 28.488(2)                                                                                                     | 23.221(4)                                                                                                   |
| <i>α</i> (°)                                                                                  | 91.9670(10)                                                                                                     | 90                                                                                                            | 90                                                                                                            | 90                                                                                                          |
| <i>β</i> (°)                                                                                  | 96.5700(10)                                                                                                     | 123.0740(10)                                                                                                  | 123.1350(10)                                                                                                  | 90                                                                                                          |
| <i>γ</i> (°)                                                                                  | 102.4650(10)                                                                                                    | 90                                                                                                            | 90                                                                                                            | 90                                                                                                          |
| V (Å <sup>3</sup> )                                                                           | 2597.7(4)                                                                                                       | 14102.8(6)                                                                                                    | 14063(2)                                                                                                      | 12723(3)                                                                                                    |
| Z                                                                                             | 1                                                                                                               | 8                                                                                                             | 8                                                                                                             | 8                                                                                                           |
| <i>D<sub>c</sub></i> (Mg / m <sup>3</sup> )                                                   | 1.597                                                                                                           | 1.907                                                                                                         | 1.744                                                                                                         | 1.484                                                                                                       |
| <i>μ</i> (Mo-K $\alpha$ )(mm <sup>-1</sup> )                                                  | 0.796                                                                                                           | 8.565                                                                                                         | 0.626                                                                                                         | 0.664                                                                                                       |
| <i>F</i> (000)                                                                                | 1268                                                                                                            | 8224                                                                                                          | 7712                                                                                                          | 5824                                                                                                        |
| $\theta$ range (°)                                                                            | 0.914 ~ 27.678                                                                                                  | 2.906 ~ 67.997                                                                                                | 1.486 ~ 27.544                                                                                                | 1.60 ~ 26.10                                                                                                |
| Limiting indices (hkl)                                                                        | -11, 11; -14, 17; -28, 29                                                                                       | -42, 39; -19, 16; -30, 33                                                                                     | -47, 44; -21, 16; -31, 36                                                                                     | -33, 38; -21, 21; -28, 27                                                                                   |
| Reflections collected                                                                         | 19301                                                                                                           | 35496                                                                                                         | 51385                                                                                                         | 20655                                                                                                       |
| Independent reflections                                                                       | 11935                                                                                                           | 12189                                                                                                         | 16108                                                                                                         | 6209                                                                                                        |
| <i>R</i> <sub>int</sub>                                                                       | 0.0162                                                                                                          | 0.0504                                                                                                        | 0.0887                                                                                                        | 0.1020                                                                                                      |
| Completeness to $\theta$ (°)                                                                  | 98.6 %                                                                                                          | 95.0 %                                                                                                        | 99.6 %                                                                                                        | 99.8 %                                                                                                      |
| Data / restraints / parameters                                                                | 11935 / 28 / 735                                                                                                | 12189 / 42 / 872                                                                                              | 16108 / 16 / 835                                                                                              | 32977 / 254 / 1515                                                                                          |
| Goodness-of-fit on <i>F</i> <sup>2</sup>                                                      | 1.047                                                                                                           | 1.010                                                                                                         | 0.933                                                                                                         | 0.963                                                                                                       |
| <i>R</i> <sub>1</sub> <sup>a</sup> , <i>wR</i> <sub>2</sub> <sup>a</sup> [I > 2 $\sigma$ (I)] | 0.0338, 0.0942                                                                                                  | 0.0870, 0.2003                                                                                                | 0.0599, 0.1364                                                                                                | 0.0696, 0.1527                                                                                              |
| <i>R</i> <sub>1</sub> , <i>wR</i> <sub>2</sub> (all data)                                     | 0.0435, 0.1076                                                                                                  | 0.0976, 0.2103                                                                                                | 0.1218, 0.1599                                                                                                | 0.1212, 0.1740                                                                                              |

<sup>a</sup>  $R_1 = \sum ||F_o| - |F_c|| / \sum |F_o|$ ;  $wR_2 = [\sum w(F_o^2 - F_c^2)^2 / \sum w(F_o^2)^2]^{1/2}$ .

## S2. Synthesize of the ligand **L**<sub>2</sub>:

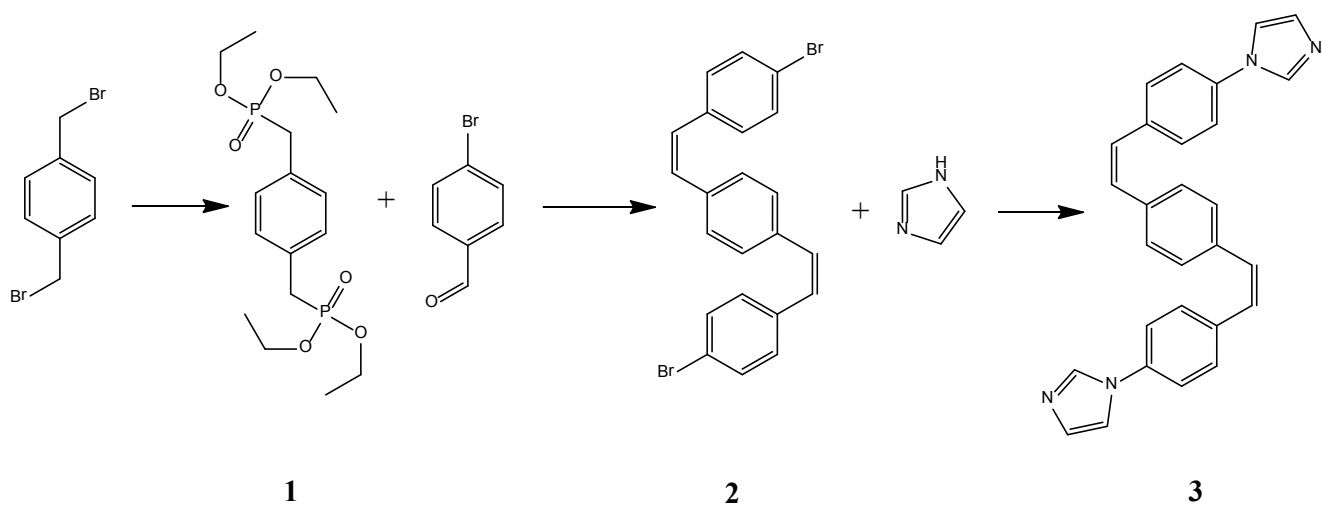

The mixture of 1,4-bis(bromomethyl)benzene **6** (1.3 g, 4.93 mmol) and triethylphosphite (20 mL) was heated to reflux for 5 h. Afterwards, excess triethylphosphite was removed under the reduced pressure. The remaining white slurry was poured into a large amount of hexanes to extract residual remains of triethylphosphite. A white solid of compound **1** was obtained by filtration (1.79 g, 4.73 mmol, 96%).

The solution of compound **1** (0.76 g, 2.0 mmol), and 4-Bromobenzaldehyde (0.82 g, 4.4 mmol) in THF (10 mL) was stirred at room temperature overnight after the slow addition of potassium tert-butoxide (1 M in THF, 4.2 mL, 4.2 mmol) under nitrogen atmosphere. The reaction was quenched with sat. NH<sub>4</sub>Cl aq. and was extracted with ethyl acetate three times. The combined organic layers were washed with brine, dried over anhydrous Na<sub>2</sub>SO<sub>4</sub>, concentrated in vacuo. The residue was purified by silica gel column chromatography to give **2** as a white crystal.

The imidazole (0.14g, 2.1 mmol) was added into the toluene solution of compound **2** (0.44g, 1.0 mmol) then stirred for 24 h under reflux. The green yellow powder of compound **3** was obtained after wash and recrystallization..

### S3. The characterization data of complex **2a~4b**:

Data of complex **2a**: IR (KBr disk):  $\nu = 3123.3, 1602.8, 1532.1, 1448.4, 1354.1, 1262.4, 1223.6, 1153.4, 1075.2, 1030.1, 822.3, 759.3, 638.42 \text{ cm}^{-1}$ .  $^1\text{H-NMR}$  (400 MHz,  $[\text{D}_6]$ -DMSO, 25 °C, TMS):  $\delta = 7.96$  (q, 8H, Ar(BiBzIm)-H), 7.62 (s, 4H, imidazolyl(N-C\*-N)-H), 7.36 (q, 8H, Ar(BiBzIm)-H), 7.13 (s, 4H, imidazolyl(Rh-N-C\*-C)-H), 6.67 (s, 8H, phenyl(DiBzIm)-H), 5.73 (s, 4H, imidazolyl(Rh-N-C-C\*)-H), 1.82 (s, 60H; Cp\*-H) ppm. Elemental analysis (%) calcd. for  $\text{C}_{98}\text{H}_{104}\text{F}_{12}\text{N}_{16}\text{O}_{14}\text{Ir}_4\text{S}_4$ : C 41.23; H 3.67; N 7.85; Found (%): C 41.28, H 3.75, N 7.69.

Data of complex **2b**: IR (KBr disk):  $\nu = 3123.1, 1602.6, 1533.1, 1448.4, 1354.0, 1262.8, 1223.6, 1153.4, 1075.0, 1030.1, 822.3, 759.3, 638.42 \text{ cm}^{-1}$ .  $^1\text{H-NMR}$  (400 MHz,  $[\text{D}_6]$ -DMSO, 25 °C, TMS):  $\delta = 8.01$  (q, 8H, Ar(BiBzIm)-H), 7.60 (s, 4H, imidazolyl(N-C\*-N)-H), 7.43 (q, 8H, Ar(BiBzIm)-H), 7.17 (s, 4H, imidazolyl(Rh-N-C\*-C)-H), 6.67 (s, 8H, phenyl(DiBzIm)-H), 5.71 (s, 4H, imidazolyl(Rh-N-C-C\*)-H), 1.87 (s, 60H; Cp\*-H) ppm. Elemental analysis (%) calcd. For  $\text{C}_{98}\text{H}_{104}\text{F}_{12}\text{N}_{16}\text{O}_{14}\text{Rh}_4\text{S}_4$ : C 47.12; H 4.20; N 8.97; Found (%): C 47.25, H 4.14, N 8.87.

Data of complex **3a**: IR (KBr disk,  $\text{cm}^{-1}$ ):  $\nu = 3123.5, 1604.1, 1523.4, 1451.2, 1353.9, 1256.1, 1224.6, 1158.5, 1125.4, 1068.7, 1031.5, 741.0 \text{ cm}^{-1}$ .  $^1\text{H NMR}$  (400 MHz,  $[\text{D}_6]$ -DMSO, 25 °C, TMS): 8.45 (s, 2H, imidazolyl(N-C\*-N)-H), 7.92 (q, 4H, Ar(BiBzIm)-H), 7.39 (s, 2H, imidazolyl(Rh-N-C\*-C)-H), 7.37 (q, 4H, Ar(BiBzIm)-H), 7.27 (d, 4H,  $J = 8.0 \text{ Hz}$ , side-phenyl-H), 7.20 (d, 4H,  $J = 12.0 \text{ Hz}$ , side-phenyl-H), 7.12 (s, 4H, centra-phenyl-H), 6.65 (d, 2H,  $J = 12.0 \text{ Hz}$ , olefin-H), 6.57 (d, 2H,  $J = 12.0 \text{ Hz}$ , olefin-H), 5.72 (s, 2H, imidazolyl (Rh-N-C-C\*)-H) 1.82 (s, 30H, Cp\*-H) ppm. Elemental analysis calcd (%) for  $\text{C}_{68}\text{H}_{70}\text{F}_6\text{N}_8\text{O}_7\text{Ir}_2\text{S}_2$ : C 48.79; H 4.22; N 6.69. Found: C 48.84; H 4.31; N 6.68.

Data of complex **3b**: IR (KBr disk,  $\text{cm}^{-1}$ ):  $\nu = 3123.9, 1604.9, 1523.4, 1451.1, 1353.9, 1256.1, 1224.2, 1158.7, 1125.4, 1069.7, 1031.5, 741.4 \text{ cm}^{-1}$ .  $^1\text{H NMR}$  (400 MHz,  $[\text{D}_6]$ -DMSO, 25 °C, TMS): 8.33 (s, 2H, imidazolyl(N-C\*-N)-H), 7.96 (q, 4H, Ar(BiBzIm)-H), 7.37 (s, 2H, imidazolyl(Rh-N-C\*-C)-H), 7.35 (q, 4H, Ar(BiBzIm)-H), 7.31 (d, 4H,  $J = 8.0 \text{ Hz}$ , side-phenyl-H), 7.22 (d, 4H,  $J = 12.0 \text{ Hz}$ , side-phenyl-H), 7.02 (s, 4H, centra-phenyl-H), 6.69 (d, 2H,  $J = 12.0 \text{ Hz}$ , olefin-H), 6.59 (d, 2H,  $J = 12.0 \text{ Hz}$ , olefin-H), 5.77 (s, 2H, imidazolyl (Rh-N-C-C\*)-H) 1.87 (s, 30H, Cp\*-H) ppm. Elemental analysis calcd (%) for  $\text{C}_{68}\text{H}_{70}\text{F}_6\text{N}_8\text{O}_7\text{Rh}_2\text{S}_2$ : C 54.62; H 4.72; N 7.49. Found(%): C 54.71; H 4.70; N 7.45.

Data of complex **4a**: IR (KBr disk,  $\text{cm}^{-1}$ ):  $\nu = 1595.8$  (s, C=O), 3007.2, 2965.7 and 2926.3 (m, Me).  $^1\text{H NMR}$  (400 MHz,  $[\text{D}_6]$ -DMSO, 25 °C, TMS): 8.20 (s, 2H, imidazolyl(N-C\*-N)-H), 7.76 (s, 2H, imidazolyl(Rh-N-C\*-C)-H), 7.55 (s, 2H, imidazolyl (Rh-N-C-C\*)-H), 7.40 (d, 4H, side-phenyl-H), 7.40 (d, 4H, side-phenyl-H), 7.12 (s, 4H, centra-phenyl-H), 6.88 (d, 2H, olefin-H), 6.85 (d, 2H, olefin-H), 1.97 (s, 6H, Me-H) 1.70 (s, 30H, Cp\*-H) ppm. Elemental analysis calcd (%) for  $\text{C}_{60}\text{H}_{64}\text{F}_6\text{N}_4\text{O}_{10}\text{Ir}_2\text{S}_2$ : C 46.08; H 4.13; N 3.58. Found(%): C 46.10; H 4.26; N 3.54.

Data of complex **4b**: IR (KBr disk,  $\text{cm}^{-1}$ ):  $\nu = 1596.5$  (s, C=O), 3007.0, 2965.7 and 2926.4 (m, C-CH<sub>3</sub>).  $^1\text{H NMR}$  (400 MHz,  $[\text{D}_6]$ -DMSO, 25 °C, TMS): 8.18 (s, 2H, imidazolyl(N-C\*-N)-H), 7.88 (s, 2H, imidazolyl(Rh-N-C\*-C)-H), 7.68 (s, 2H, imidazolyl (Rh-N-C-C\*)-H), 7.43 (d, 4H,  $J = 8.0 \text{ Hz}$ , side-phenyl-H), 7.37 (d, 4H,  $J = 8.0 \text{ Hz}$ , side-phenyl-H), 7.06 (s, 4H, centra-phenyl-H), 6.79 (d, 2H,  $J = 12.0 \text{ Hz}$ , olefin-H), 6.73 (d, 2H,  $J = 12.0 \text{ Hz}$ , olefin-H), 1.97 (s, 6H, Me-H) 1.74 (s, 30H, Cp\*-H) ppm. Elemental analysis calcd (%) for  $\text{C}_{60}\text{H}_{64}\text{F}_6\text{N}_4\text{O}_{10}\text{Rh}_2\text{S}_2$ : C, 52.03; H, 4.66; N, 4.04 Found(%): C 51.97; H 4.71; N 3.99.

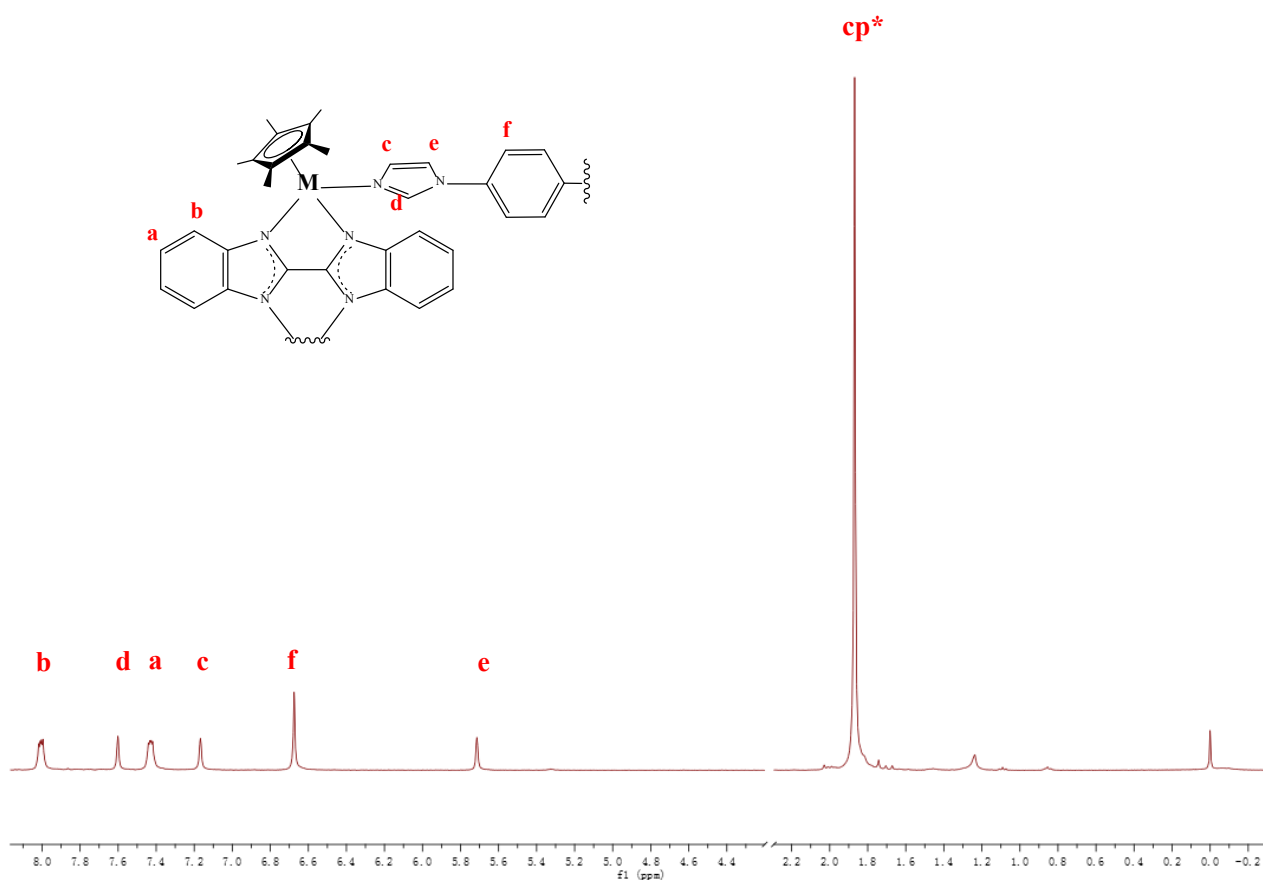

Figure 1. <sup>1</sup>H NMR (400 MHz, DMSO) spectrum of complex **2b**.

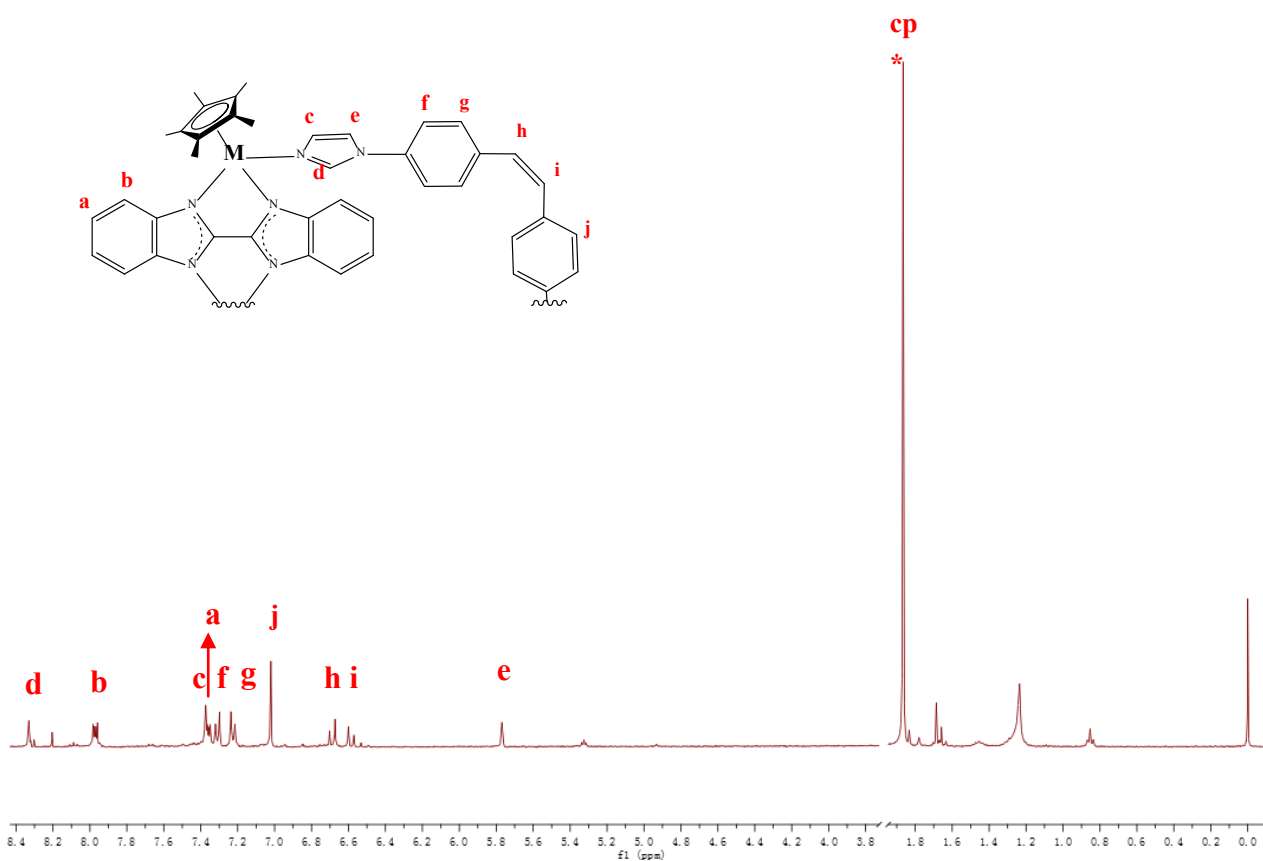

Figure 2. <sup>1</sup>H NMR (400 MHz, DMSO) spectrum of complex **3b**.

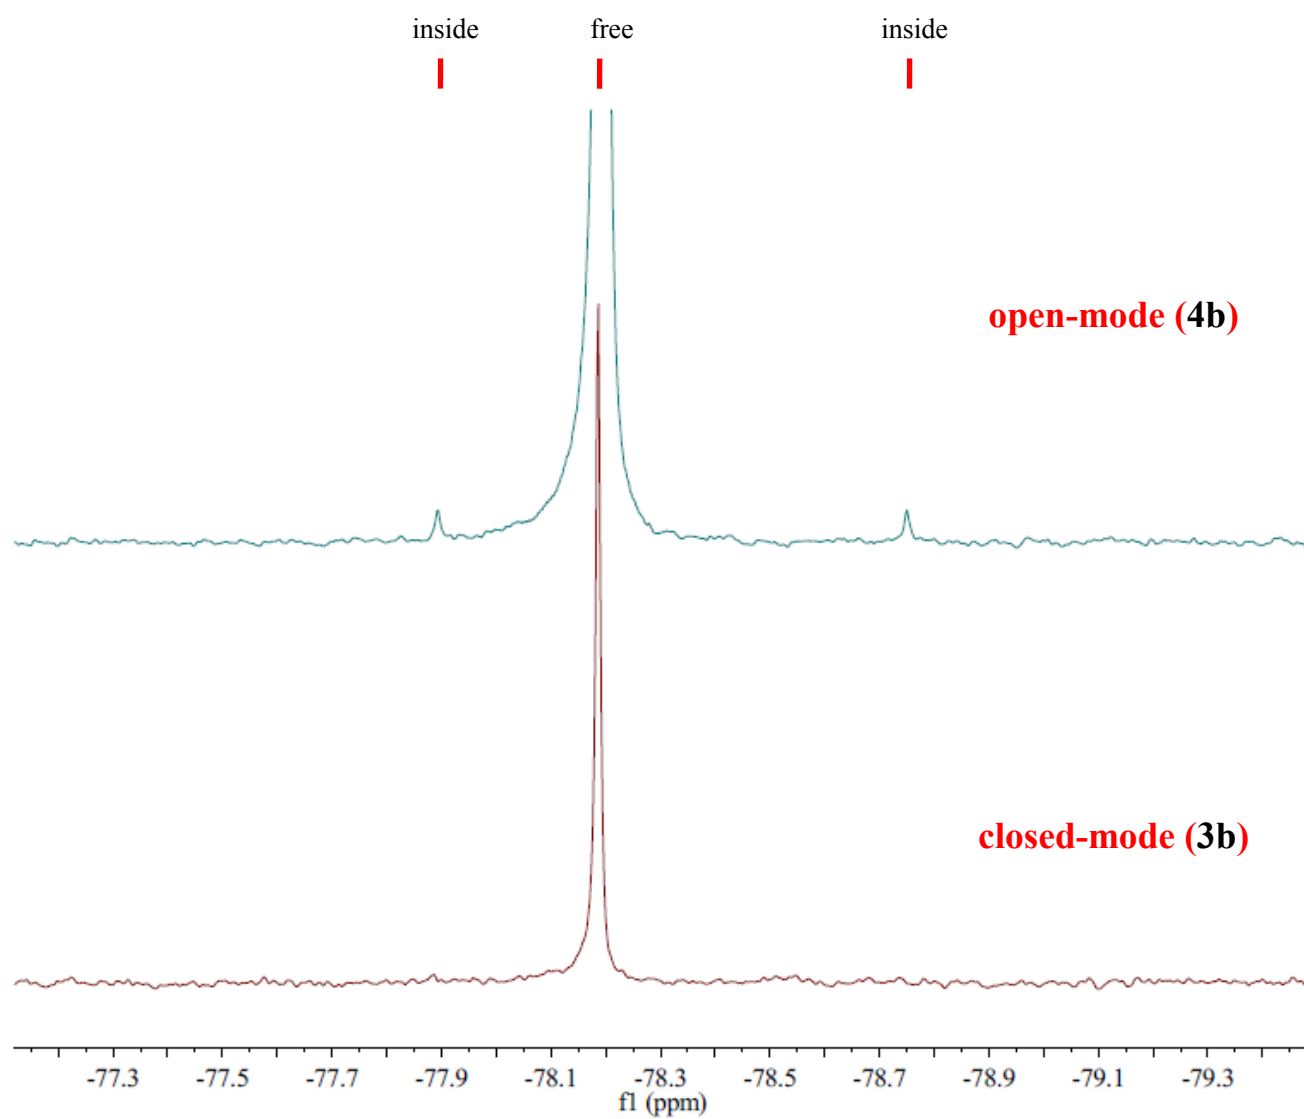

Figure 3.  $^{19}\text{F}$  NMR spectra of **3b** and **4b**.

S4.

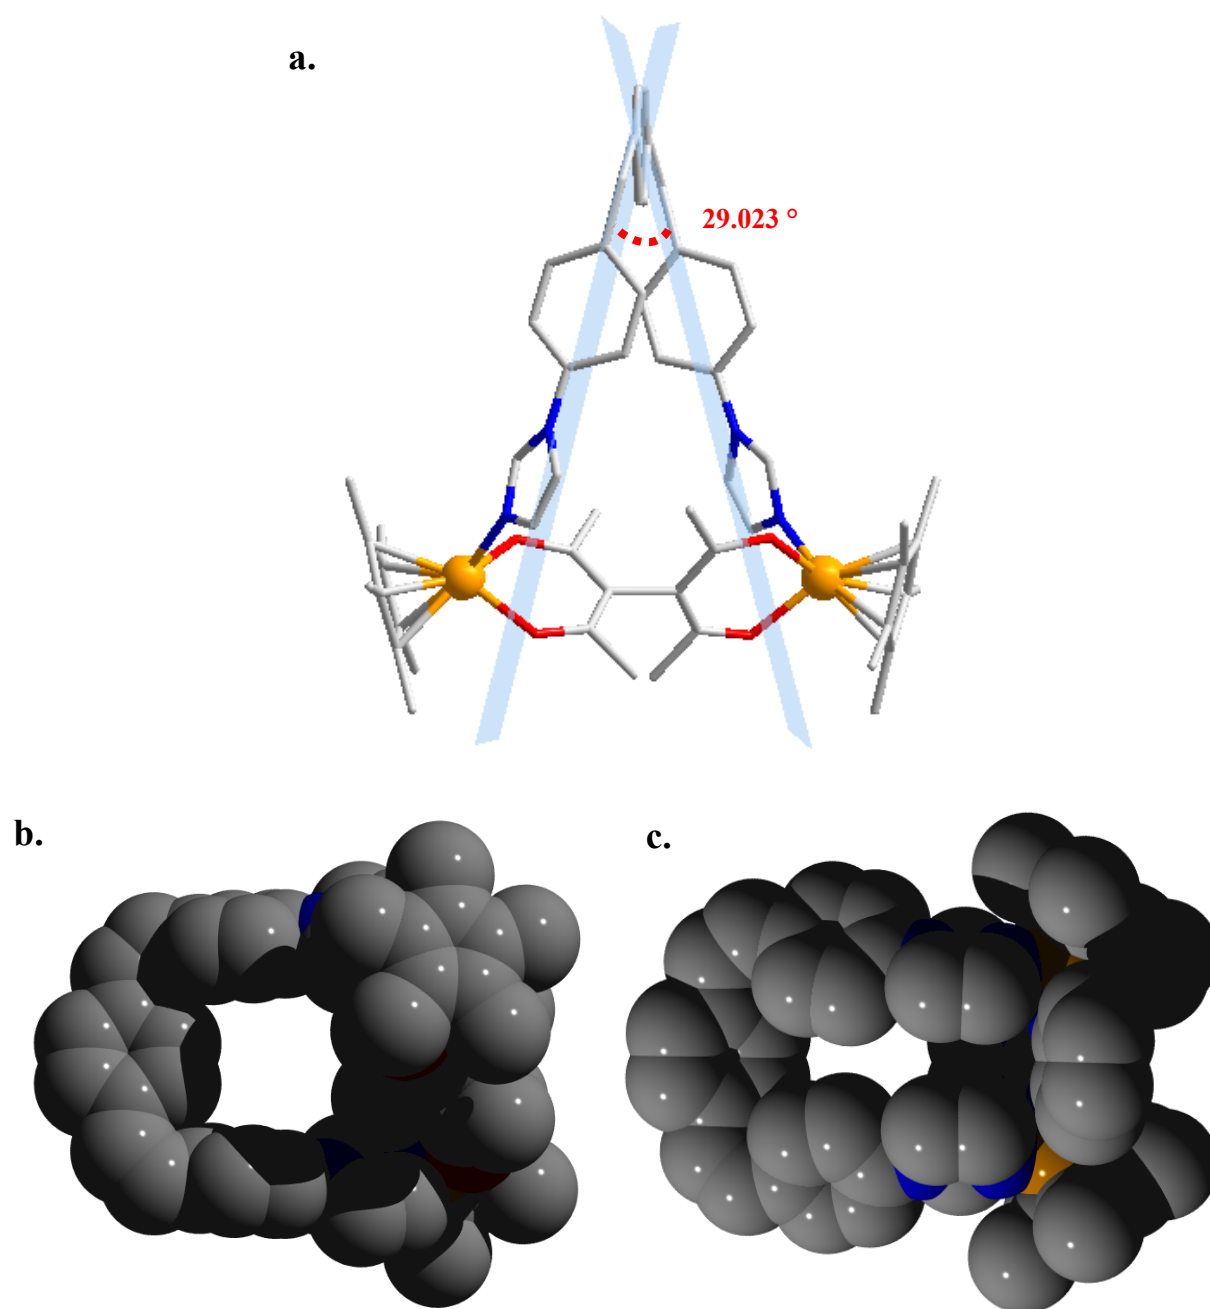

Figure 4. a) The angle between two plane (plane(C9, C10, C11, C14) and plane(C9A, C10A, C11A, C14A)) is 29.023°; b) open mode of the complex **4b** with space-filling structure; c) closed mode of the complex **3b** with space-filling structure.

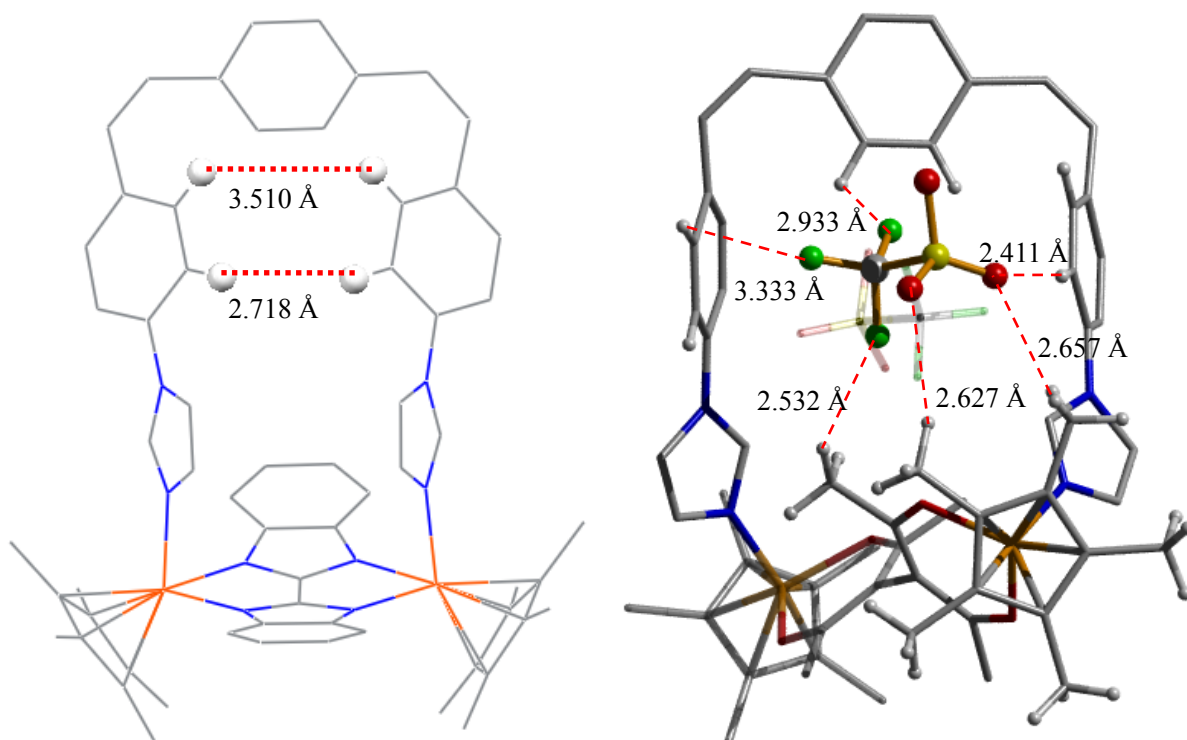

Figure 5. Left: intermolecular interaction within two benzene rings of cation **3b**; right: intramolecular interaction between anions with the host structure of cation **4b**.(white ball: H, green ball: F, red ball: O, yellow ball: S, gray: C, blue: N, orange: Rh)

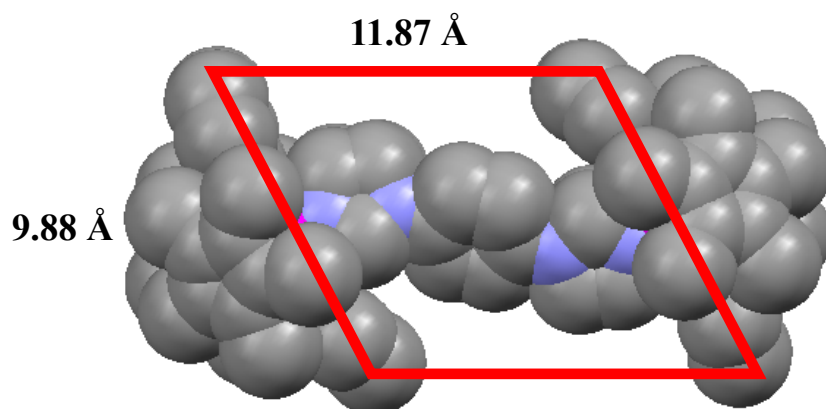

Figure 6. A standard rhombus structure for the cation **2b**.
